# Supplementary material
Source: PubMed Central journal article supplement (PMC5539413)
Supplement: NIHMS886878-supplement-Supplemental-Fig2.pdf [file NIHMS886878-supplement-Supplemental-Fig2.pdf]

**Supplementary Table 1. Compressive stress reduces cell layer thickness without altering cell volume.**

| Exp. #        | Cell layer thickness <sup>1</sup> ( $\mu\text{m}$ ) |             |                  | Cell volume <sup>2</sup> ( $\times 10^4 \mu\text{m}^3$ ) |             |                  |
|---------------|-----------------------------------------------------|-------------|------------------|----------------------------------------------------------|-------------|------------------|
|               | Control                                             | Compression | % change         | Control                                                  | Compression | % change         |
| 1             | 8.5                                                 | 7.5         | -11.8            | 4.24                                                     | 4.26        | .05              |
| 2             | 28                                                  | 25          | -10.7            | 8.7                                                      | 8.5         | -2.3             |
| 3             | 14                                                  | 13          | -7.1             | 6.8                                                      | 6.4         | -5.9             |
| 4             | 20                                                  | 17.5        | -12.5            | 9.8                                                      | 9.89        | 0.9              |
| 5             | 17.5                                                | 15.5        | -11.4            | 13.9                                                     | 13.6        | -2.2             |
| 6             | 22                                                  | 19.5        | -11.3            | 11                                                       | 10.9        | -0.9             |
| 7             | 10.5                                                | 9.5         | -9.5             | 5.2                                                      | 5.14        | -1.1             |
| mean $\pm$ SD |                                                     |             | -10.6 $\pm$ 1.9* |                                                          |             | -1.6 $\pm$ 2.3** |

<sup>1</sup>The thickness of the cell layer was determined by measuring the number of X-Y slices between fluorescein-dextran layers and subtracting the thickness of the substrate (Figure 1A). <sup>2</sup>Cellular volumes were determined by first computing the area occupied by cells in a  $72\mu\text{m}\times 72\mu\text{m}$  field using a threshold defined as the average cell boundary intensity value at multiple locations in a field. This area was then multiplied by the slice thickness, and all slices over the height of the cell layer were added together. \*  $p < 0.01$  by paired Student's  $t$ -test. \*\* Not statistically different from cell volume before pressure by paired Student's  $t$ -test ( $p > 0.05$ ).
