# Supplementary material
Source: PubMed Central journal article supplement (PMC5539413)
Supplement: NIHMS886878-supplement-Supplemental-Fig3.pdf [file NIHMS886878-supplement-Supplemental-Fig3.pdf]

**Supplementary Table 2. LIS volume is dramatically decreased by compressive stress.**

| Exp. # | LIS volume <sup>1</sup> ( $\mu\text{m}^3$ ) |                    | % change         |
|--------|---------------------------------------------|--------------------|------------------|
|        | Control                                     | Compressive Stress |                  |
| 1      | 8799                                        | 544                | -93.8            |
| 2      | 14444                                       | 1866               | -87.1            |
| 3      | 13735                                       | 818                | -94.0            |
| 4      | 16645                                       | 1425               | -91.4            |
| 5      | 6338                                        | 1892               | -70.1            |
|        |                                             | mean $\pm$ SD      | -87.3 $\pm$ 10.0 |

<sup>1</sup>LIS volumes were computed by first using the technique detailed in Supplementary Table 1 to obtain cell area in each slice, then subtracting this area from the total image area. Image slices were summed over the height of the stack and total LIS volume computed. Similar results were obtained when LIS volume was computed directly with cell-impermeant dextran (data not shown).
